# Supplementary material for: Molecular characteristics and antimicrobial susceptibility of carbapenem-resistant Klebsiella pneumoniae in a multicenter study in Ningbo, China
Source: Front Microbiol. 2025 Jul 21;16:1628592. doi: 10.3389/fmicb.2025.1628592 (PMC12318958; doi:10.3389/fmicb.2025.1628592)
Supplement: Supplementary file 1 [file Table_1.xlsx]

## Sheet: 81 isolates of CRKP data
Strains	Accession number	Source	Sample	Strain Isolation Time	MLST	KL	Basic information			Underlying Diseases	Invasive manipulation						Clinical Outcomes								Clinical Outcomes	The allelic profiles of seven housekeeping genes							β-Lactamase genes	plasmid type	Aminoglycoside resistance genes	Quinolone resistance genes	Virulence genes	Tetracycline resistance genes‌	MICs(mg/L)
							Age (years)	Gender	Separated department		CVC	Endotracheal Intubation	Tracheostomy	Mechanical ventilation	Puncture	Drainage Tube Insertion	Carbapenems	Cephalosporins	β-Lactam/β-Lactamase Inhibitor Combinations	Quinolone	Aminoglycosides	Polypeptide	Tetracycline	Glycopeptides	28-Day Mortality	gapA	infB	mdh	pgi	phoE	rpoB	tonB							CTT	CRO	FEP	TZP	IPM	GEN	LVX	CIP	AZA	POL	TGC
CR-KP01	JBLJWK000000000	Xiangshan	blood	2023-05-02	11	61	81	Male	ICU	Diabetes Mellitus、Malignant Tumor、Personal History of Cerebral Infarction	yes	yes	yes	yes	no	no	no	no	yes	no	no	no	no	no	no	3	3	1	1	1	1	4	blaKPC-2;blaCTX-M-65;blaSHV-11;blaTEM-1	IncFII	/	gyrB、parC、parE	fyuA、irp1、irp2、ybtS、mrkA、mrkB、mrkC、mrkD	/	256	≥128	≥128	≥256/4	64	1	≥16	≥16	0.5/4	0.5	0.5
CR-KP02	JBLJWL000000000	Xiangshan	sputum	2023-05-08	11	64	67	Female	ICU	/	yes	yes	yes	yes	no	no	no	no	yes	no	no	no	no	no	no	3	3	1	1	1	1	4	blaKPC-2;blaSHV-11	IncFII、repB	/	gyrB、parC、parE、qnrS	rmpA2、fyuA、irp1、irp2、iucA、iucB、iucC、iucD、iutA、ybtS、mrkA、mrkB、mrkC、mrkD	tet(A)	128	≥128	≥128	≥256/4	64	0.25	≥16	≥16	0.25/4	0.5	0.5
CR-KP03	JBLJWM000000000	Xiangshan	urine	2023-05-10	11	61	90	Male	ICU	Diabetes Mellitus、Cholelithiasis、Personal History of Cerebral Infarction	yes	yes	no	yes	no	no	no	no	yes	no	no	no	no	no	no	3	3	1	1	1	1	4	blaKPC-2;blaCTX-M-65;blaSHV-11;blaTEM-1	IncFII	/	gyrB、parC、parE	fyuA、irp1、irp2、ybtS、mrkA、mrkB、mrkC、mrkD	/	256	≥128	≥128	≥256/4	64	2	≥16	≥16	0.5/4	0.5	0.25
CR-KP04	JBLJWN000000000	Xiangshan	sputum	2023-05-12	35	22	74	Male	Thoracic Surgery	Malignant Tumor	yes	yes	yes	yes	no	no	yes	no	yes	no	no	no	no	no	no	2	1	2	1	10	1	19	blaKPC-3;blaOXA-10;blaSHV-33	IncX5	aph(6)-Id	gyrB、parC、parE、qnrS	iucA、iucB、iucC、iucD、iutA、mrkA、mrkB、mrkC、mrkD	tet(A)	256	≥128	≥128	≥256/4	16	0.125	0.5	0.25	1/4	0.5	0.25
CR-KP05	JBLJWP000000000	Xiangshan	secretion	2023-07-07	290	21	55	Female	ICU	Diabetes Mellitus	yes	yes	yes	yes	no	no	yes	no	no	no	no	yes	no	no	no	2	1	1	37	10	1	86	blaNDM-5;blaSHV-1	IncFIB、IncX3	/	gyrB、parC、parE、qnrS	iucA、iucB、iucC、iucD、iutA、mrkA、mrkB、mrkC、mrkD	/	128	≥128	128	≥256/4	32	0.25	1	0.5	0.064/4	1	0.25
CR-KP06	JBLJWQ000000000	Xiangshan	sputum	2023-07-26	685	16	92	Female	Respiratory Critical Care Unit	Hypertension	no	no	no	no	no	no	no	no	no	no	no	no	no	no	no	2	1	2	1	3	4	25	blaNDM-5;blaCTX-M-65;blaSHV-103;blaTEM-1	IncR、IncX3	aph(3')-Ia、aac(3)-IId、aac(6')-Ib-cr、aph(6)-Id	gyrB、parC、parE	mrkA、mrkB、mrkC、mrkD、allR、allS	tet(A)	32	≥128	64	≥256/4	32	16	8	≥16	0.125/4	1	0.5
CR-KP07	JBLJWR000000000	Xiangshan	urine	2023-08-07	15	48	40	Male	neurosurgery	Liver Dysfunction	yes	no	no	no	no	no	no	no	no	no	no	no	yes	no	no	1	1	1	1	1	1	1	blaNDM-5;blaOXA-1;blaCTX-M-15;blaSHV-28;blaTEM-1	IncX3	aph(3')-Ia、aac(6')-Ib-cr	gyrB、parC、parE	mrkB、mrkC、mrkD	/	256	≥128	128	≥256/4	32	2	16	≥16	0.125/4	1	0.25
CR-KP08	JBLJWS000000000	Xiangshan	sputum	2023-08-13	11	64	68	Male	Respiratory Critical Care Unit	/	no	no	no	no	no	no	no	no	no	no	yes	no	no	no	no	3	3	1	1	1	1	4	blaKPC-2;blaSHV-12;blaTEM-1	repB	/	gyrB、parC、parE	rmpA2、fyuA、irp1、irp2、iucA、iucB、iucC、iucD、iutA、ybtS、mrkA、mrkB、mrkC、mrkD	tet(A)	256	≥128	≥128	≥256/4	32	2	≥16	≥16	0.5/4	0.5	1
CR-KP09	JBLJWU000000000	Xiangshan	sputum	2023-09-30	437	36	81	Male	ICU	Diabetes Mellitus、Personal History of Cerebral Infarction、Malignant Tumor、Hypertension	yes	yes	yes	yes	no	no	no	no	yes	no	no	no	no	no	no	3	3	1	1	1	1	31	blaIMP-4;blaCTX-M-55;blaSHV-11;blaTEM-1	IncFII	aph(3')-Ia、aph(3')-IIa、aac(3)-IId、armA	gyrB、parC、parE	fyuA、irp2、iucA、iucB、iucC、iucD、iutA、ybtS、mrkA、mrkB、mrkC、mrkD	/	≥256	≥128	≥128	64/4	64	≥256	16	≥16	0.125/4	0.5	0.125
CR-KP10	JBLJWV000000000	Xiangshan	urine	2023-10-18	437	36	56	Female	neurosurgery	Diabetes Mellitus、Hypertension	no	no	no	no	yes	no	no	no	yes	no	yes	no	no	no	no	3	3	1	1	1	1	31	blaIMP-4;blaCTX-M-55;blaSHV-11;blaTEM-1	IncFII	aph(3')-Ia、aph(3')-IIa、aac(3)-IId、armA	gyrB、parC、parE	fyuA、irp2、iucA、iucB、iucC、iucD、iutA、ybtS、mrkA、mrkB、mrkC、mrkD	/	≥256	≥128	≥128	16/4	64	≥256	8	16	0.064/4	0.5	0.125
CR-KP11	JBLJWW000000000	Xiangshan	sputum	2023-11-23	437	36	71	Female	ICU	Hypertension、Malignant Tumor	no	no	no	no	yes	no	no	yes	yes	no	no	no	no	no	no	3	3	1	1	1	1	31	blaIMP-4;blaCTX-M-55;blaSHV-11;blaTEM-1	IncFII	aph(3')-Ia、aph(3')-IIa、aac(3)-IId、armA	gyrB、parC、parE	fyuA、irp2、iucA、iucB、iucC、iucD、iutA、ybtS、mrkA、mrkB、mrkC、mrkD	/	256	≥128	≥128	16/4	4	≥256	16	≥16	0.064/4	0.5	0.25
CR-KP12	JBLJWX000000000	Xiangshan	sputum	2023-12-10	437	36	68	Male	ICU	Diabetes Mellitus、Hypertension	yes	yes	yes	yes	no	no	no	no	no	no	yes	no	no	yes	no	3	3	1	1	1	1	31	blaIMP-4;blaCTX-M-55;blaSHV-11;blaTEM-1	IncFII	aph(3')-Ia、aph(3')-IIa、aac(3)-IId、armA	gyrB、parC、parE	fyuA、irp2、iucA、iucB、iucC、iucD、iutA、ybtS、mrkA、mrkB、mrkC、mrkD	/	≥256	≥128	≥128	16/4	4	≥256	8	16	0.064/4	0.5	0.125
CR-KP13	JBLJWY000000000	Xiangshan	secretion	2023-12-17	11	64	66	Female	ICU	Diabetes Mellitus	yes	yes	yes	yes	no	no	yes	no	no	no	no	yes	no	no	no	3	3	1	1	1	1	4	blaKPC-2;blaSHV-12;blaTEM-1	IncFII、repB	/	gyrB、parC、parE	rmpA2、fyuA、irp1、irp2、iucA、iucB、iucC、iucD、iutA、ybtS、mrkA、mrkB、mrkC、mrkD	tet(A)	256	≥128	128	≥256/4	32	1	≥16	≥16	0.5/4	16	0.25
CR-KP14	JBLJWZ000000000	Xiangshan	blood	2024-01-25	11	64	64	Male	ICU	Malignant Tumor、Cholelithiasis	yes	yes	yes	yes	yes	no	yes	no	yes	no	no	no	no	no	no	3	3	1	1	1	1	4	blaKPC-2;blaSHV-12;blaTEM-1	IncFII、repB	/	gyrB、parC、parE	rmpA2、fyuA、irp1、irp2、iucA、iucB、iucC、iucD、iutA、ybtS、mrkA、mrkB、mrkC、mrkD	tet(A)	256	≥128	≥128	≥256/4	64	2	≥16	≥16	1/4	0.5	1
CR-KP15	JBLGXA000000000	Xiangshan	puncture fluid	2024-02-10	11	47	64	Female	Hepatobiliary and pancreatic surgery	/	yes	no	no	no	yes	yes	yes	yes	yes	no	yes	no	yes	no	no	3	3	1	1	1	1	4	blaKPC-2;blaCTX-M-65;blaDHA-1;blaSHV-12;blaTEM-1	IncFII、IncHI1B	armA	gyrB、parC、parE	fyuA、irp1、irp2、ybtS、mrkA、mrkB、mrkC、mrkD	/	≥256	≥128	≥128	≥256/4	32	2	≥16	≥16	1/4	0.5	0.25
CR-KP16	JBLGXB000000000	Xiangshan	sputum	2024-03-05	11	64	40	Male	ICU	Hypertension	yes	no	no	no	yes	no	yes	yes	yes	no	yes	yes	no	no	no	3	3	1	1	1	1	4	blaKPC-2;blaCTX-M-65;blaSHV-11;blaTEM-1	IncFII、repB	/	gyrB、parC、parE	rmpA2、fyuA、irp1、irp2、iucA、iucB、iucC、iucD、iutA、ybtS、mrkA、mrkB、mrkC、mrkD	/	256	≥128	≥128	≥256/4	32	2	≥16	≥16	0.25/4	0.5	0.25
CR-KP17	JBLGXC000000000	Xiangshan	sputum	2024-03-14	11	61	70	Male	Respiratory Critical Care Unit	/	no	yes	yes	yes	no	no	no	no	yes	no	yes	no	no	no	no	3	3	1	1	1	1	4	blaKPC-2;blaCTX-M-65;blaSHV-11;blaTEM-1	IncFII	/	gyrB、parC、parE	fyuA、irp1、irp2、ybtS、mrkA、mrkB、mrkC、mrkD	/	256	≥128	≥128	≥256/4	64	2	≥16	≥16	0.5/4	0.5	0.25
CR-KP18	JBLGXD000000000	Xiangshan	sputum	2024-03-24	11	61	65	Female	ICU	/	yes	yes	yes	yes	no	no	yes	no	yes	no	no	no	no	no	no	3	3	1	1	1	1	4	blaKPC-2;blaCTX-M-65;blaSHV-11;blaTEM-1	IncFII	/	gyrB、parC、parE	fyuA、irp1、irp2、ybtS、mrkA、mrkB、mrkC、mrkD	/	256	≥128	≥128	≥256/4	32	1	≥16	≥16	0.5/4	0.5	0.5
CR-KP19	JBLGXE000000000	Xiangshan	sputum	2024-04-05	11	64	74	Male	ICU	Personal History of Cerebral Infarction	no	no	no	no	no	no	no	no	yes	no	no	no	no	no	no	3	3	1	1	1	1	4	blaKPC-2;blaCTX-M-65;blaSHV-11;blaTEM-1	IncFII、repB	/	gyrB、parC、parE、qnrS	rmpA2、fyuA、irp1、irp2、iucA、iucB、iucC、iucD、iutA、ybtS、mrkA、mrkB、mrkC、mrkD	tet(A)	≥256	≥128	≥128	≥256/4	64	1	≥16	≥16	1/4	0.5	1
CR-KP20	JBLGXF000000000	Xiangshan	blood	2024-04-13	15	112	83	Male	ICU	Diabetes Mellitus、Personal History of Cerebral Infarction	yes	no	no	no	yes	no	no	no	yes	no	no	no	no	no	no	1	1	1	1	1	1	1	blaOXA-232;blaCTX-M-15;blaSHV-28	ColKP3、IncHI1B、repB	/	gyrB、parC、parE	rmpA2、fyuA、irp1、irp2、iucA、iucB、iucC、iucD、iutA、ybtS、mrkA、mrkB、mrkC、mrkD	/	16	≥128	≥128	≥256/4	32	8	16	≥16	0.125/4	0.5	0.064
CR-KP21	JBLGXG000000000	Xiangshan	sputum	2024-05-21	11	61	64	Male	ICU	Malignant Tumor	yes	yes	yes	yes	yes	no	yes	no	yes	no	no	no	no	no	no	3	3	1	1	1	1	4	blaKPC-2;blaCTX-M-65;blaSHV-11;blaTEM-1	IncFII	/	gyrB、parC、parE	fyuA、irp1、irp2、ybtS、mrkA、mrkB、mrkC、mrkD	/	256	≥128	≥128	≥256/4	64	2	≥16	≥16	0.5/4	1	0.25
CR-KP22	JBLGXI000000000	Ninghai	sputum	2023-05-30	11	64	83	Male	ICU	Diabetes Mellitus、Personal History of Cerebral Infarction	yes	no	no	no	yes	no	no	no	yes	no	no	no	no	no	no	3	3	1	1	1	1	4	blaKPC-2;blaSHV-12;blaTEM-1	IncFII、repB	/	gyrB、parC、parE	rmpA2、fyuA、irp1、irp2、iucA、iucB、iucC、iucD、iutA、ybtS、mrkA、mrkB、mrkC、mrkD	tet(A)	256	≥128	128	≥256/4	32	0.5	≥16	≥16	0.5/4	0.5	0.5
CR-KP23	JBLGXG000000000	Ninghai	sputum	2023-06-04	11	64	38	Male	Nephrology Ward	Hypertension	no	no	no	no	no	no	no	yes	no	no	no	no	no	no	no	3	3	1	1	1	1	4	blaKPC-2;blaCTX-M-55;blaSHV-11;blaTEM-1	IncFII、IncI1-I	/	gyrB、parC、parE	rmpA2、fyuA、irp2、iucA、iucB、iucC、iucD、iutA、ybtS、mrkA、mrkB、mrkC、mrkD	/	256	≥128	≥128	≥256/4	64	1	≥16	≥16	0.5/4	2	1
CR-KP24	JBLGXK000000000	Ninghai	sputum	2023-06-28	15	24	65	Male	ICU	Hypertension	yes	yes	yes	yes	yes	no	no	no	yes	no	no	no	no	no	no	1	1	1	1	1	1	1	blaKPC-2;blaSHV-28	IncFIB	/	gyrB、parC、parE	rmpA2、fyuA、irp1、iucA、iucB、iucC、iucD、iutA、ybtS、mrkB、mrkC、mrkD	/	32	≥128	32	256/4	16	0.125	≥16	≥16	0.125/4	0.5	0.125
CR-KP25	JBLGXL000000000	Ninghai	blood	2023-07-19	15	19	90	Female	ICU	Diabetes Mellitus、Hypertension、Personal History of Cerebral Infarction	yes	yes	yes	yes	yes	no	no	no	yes	no	no	no	no	no	no	1	1	1	1	1	1	1	blaKPC-2;blaOXA-1;blaCTX-M-15;blaSHV-28;blaTEM-1	repB	aac(3)-IId、aac(6')-Ib-cr	gyrB、parC、parE	fyuA、irp2、ybtS、mrkA、mrkB、mrkC、mrkD	tet(A)	4	≥128	128	≥256/4	16	2	8	≥16	0.125/4	0.5	0.125
CR-KP26	JBLGXM000000000	Ninghai	sputum	2023-07-25	1203	2	65	Male	ICU	Liver Dysfunction	yes	yes	yes	yes	yes	no	no	no	yes	no	no	no	no	no	no	2	6	1	1	1	1	31	blaKPC-2;blaCTX-M-65;blaDHA-1;blaSHV-65;blaTEM-1	IncFII	aph(3')-Ia、aac(3)-IId	gyrB、parC、parE	fyuA、irp1、irp2、ybtS、mrkB、mrkC、mrkD	/	64	≥128	8	256/4	8	2	2	1	0.125/4	0.5	0.5
CR-KP27	JBLGXN000000000	Ninghai	puncture fluid	2023-08-24	11	61	68	Female	Hepatobiliary and pancreatic surgery	Hypertension	no	no	no	no	no	no	no	yes	no	no	no	no	no	no	no	3	3	1	1	1	1	4	blaKPC-2;blaSHV-11	IncFII	/	gyrB、parC、parE	fyuA、irp1、irp2、ybtS、mrkA、mrkB、mrkC、mrkD	/	128	≥128	64	≥256/4	32	0.25	≥16	≥16	0.5/4	0.5	0.25
CR-KP28	JBLGXO000000000	Ninghai	sputum	2023-09-06	11	64	68	Female	ICU	Hypertension、Personal History of Cerebral Infarction、Liver Dysfunction	yes	yes	yes	yes	no	no	yes	no	yes	no	no	no	no	yes	no	3	3	1	1	1	1	4	blaKPC-2;blaSHV-12;blaTEM-1	IncFII、repB	/	gyrB、parC、parE、qnrS	rmpA2、fyuA、irp1、irp2、iucA、iucB、iucC、iucD、iutA、ybtS、mrkA、mrkB、mrkC、mrkD	tet(A)	128	≥128	≥128	≥256/4	32	1	≥16	≥16	0.5/4	0.5	0.5
CR-KP29	JBLGXP000000000	Ninghai	sputum	2023-09-15	11	64	80	Male	Hepatology and Infectious Diseases Ward	Hypertension、Malignant Tumor	no	no	no	no	no	no	no	no	yes	no	no	no	no	no	no	3	3	1	1	1	1	4	blaKPC-2;blaCTX-M-65;blaSHV-11;blaTEM-1	IncFII、repB	/	gyrB、parC、parE	rmpA2、fyuA、irp1、irp2、iucA、iucB、iucC、iucD、iutA、ybtS、mrkA、mrkB、mrkC、mrkD	/	256	≥128	≥128	≥256/4	32	2	≥16	≥16	0.25/4	0.5	0.125
CR-KP30	JBLGXQ000000000	Ninghai	blood	2023-10-26	11	61	84	Male	ICU	Hypertension	yes	yes	yes	yes	no	no	yes	no	yes	no	no	no	no	yes	no	3	3	1	1	1	1	4	blaKPC-2;blaSHV-11;blaTEM-1	IncFII	/	gyrB、parC、parE	fyuA、irp1、irp2、ybtS、mrkA、mrkB、mrkC、mrkD	/	128	≥128	128	≥256/4	64	1	≥16	≥16	0.5/4	0.5	0.5
CR-KP31	JBLGXR000000000	Ninghai	puncture fluid	2023-11-03	11	64	67	Female	ICU	Diabetes Mellitus、Hypertension	yes	yes	yes	yes	yes	no	yes	yes	yes	no	no	no	yes	yes	no	3	3	1	1	1	1	4	blaKPC-2;blaCTX-M-3;blaCTX-M-65;blaSHV-12;blaTEM-1	IncFII	aac(3)-IId	gyrB、parC、parE、qnrS	fyuA、irp1、irp2、ybtS、mrkA、mrkB、mrkC、mrkD	/	256	≥128	≥128	≥256/4	64	1	≥16	≥16	1/4	0.5	0.25
CR-KP32	JBLGXS000000000	Ninghai	sputum	2023-12-23	11	64	80	Male	ICU	Hypertension、Liver Dysfunction	yes	yes	yes	yes	no	no	no	no	yes	no	no	no	no	no	no	3	3	1	1	1	1	4	blaKPC-2;blaCTX-M-65;blaSHV-12;blaTEM-1	IncFII	aac(3)-IId	gyrB、parC、parE、qnrS	fyuA、irp1、irp2、ybtS、mrkA、mrkB、mrkC、mrkD	/	256	≥128	≥128	≥256/4	64	1	≥16	≥16	0.5/4	0.5	0.25
CR-KP33	JBLGXT000000000	Ninghai	sputum	2024-01-03	11	64	76	Female	ICU	Diabetes Mellitus、Hypertension	yes	yes	yes	yes	no	no	no	no	yes	no	no	no	no	no	no	3	3	1	1	1	1	4	blaKPC-2;blaSHV-12;blaTEM-1	IncFII、repB	/	gyrB、parC、parE	rmpA2、fyuA、irp1、irp2、iucA、iucB、iucC、iucD、iutA、ybtS、mrkA、mrkB、mrkC、mrkD	tet(A)	128	≥128	≥128	≥256/4	32	2	≥16	≥16	0.5/4	0.5	1
CR-KP34	JBLGXU000000000	Ninghai	sputum	2024-02-21	11	47	90	Female	ICU	Diabetes Mellitus、Hypertension、Personal History of Cerebral Infarction	yes	yes	yes	yes	no	no	no	no	yes	no	no	no	no	no	no	3	3	1	1	1	1	4	blaKPC-2;blaCTX-M-65;blaDHA-1;blaSHV-12;blaTEM-1	IncFIB、IncFII、IncHI1B	armA、aac(3)-IId	gyrB、parC、parE	rmpA2、irp1、irp2、iucA、iucB、iucC、iucD、iutA、ybtS、mrkA、mrkB、mrkC、mrkD	/	≥256	≥128	≥128	≥256/4	32	4	≥16	≥16	2/4	0.5	0.125
CR-KP35	JBLGXV000000000	Ninghai	sputum	2024-03-19	11	64	73	Male	Nephrology Ward	Diabetes Mellitus、Hypertension	no	no	no	no	no	no	yes	no	yes	no	no	no	no	yes	no	3	3	1	1	1	1	4	blaKPC-2;blaCTX-M-65;blaSHV-11;blaTEM-1	IncFII、repB、IncQ1	aph(3')-Ia、aac(6')-Ib-cr	gyrB、parC、parE、qnrS	rmpA、rmpA2、fyuA、irp1、irp2、iucA、iucB、iucC、iucD、iutA、ybtS、mrkA、mrkB、mrkC、mrkD	tet(A)	128	≥128	≥128	≥256/4	64	≥256	≥16	≥16	0.5/4	4	0.25
CR-KP36	JBLGXW000000000	Ninghai	sputum	2024-04-07	11	47	67	Male	ICU	Malignant Tumor	yes	yes	yes	yes	no	no	yes	yes	yes	no	no	no	no	no	no	3	3	1	1	1	1	4	blaKPC-2;blaCTX-M-65;blaSHV-11;blaTEM-1	IncFII	aac(3)-IId	gyrB、parC、parE	rmpA2、fyuA、irp1、irp2、iucA、iucB、iucC、iucD、iutA、ybtS、mrkA、mrkB、mrkC、mrkD	/	128	≥128	≥128	≥256/4	32	1	16	≥16	1/4	0.5	0.125
CR-KP37	JBLGXX000000000	Ninghai	sputum	2024-04-21	11	64	46	Male	ICU	/	no	no	no	no	yes	no	no	no	yes	yes	no	yes	no	yes	no	3	3	1	1	1	1	4	blaKPC-2;blaNDM-1;blaCTX-M-65;blaSHV-11;blaTEM-1	IncFII、IncX3、repB	aac(3)-IId、aac(6')-Ib-cr、aph(6)-Id	gyrB、parC、parE、qnrS	rmpA2、fyuA、irp1、iucA、iucB、iucC、iucD、iutA、ybtS、mrkA、mrkB、mrkC、mrkD	/	256	≥128	≥128	≥256/4	32	1	16	≥16	0.5/4	0.5	0.125
CR-KP38	JBLGXZ000000000	Yinzhou	sputum	2023-05-15	11	64	39	Male	ICU	Liver Dysfunction	yes	yes	yes	yes	no	no	no	no	yes	no	no	no	no	no	no	3	3	1	1	1	1	4	blaKPC-2;blaSHV-11	IncFII、repB	/	gyrB、parC、parE、qnrS	rmpA、rmpA2、fyuA、irp1、irp2、iucA、iucB、iucC、iucD、iutA、ybtS、mrkA、mrkB、mrkC、mrkD	tet(A)	≥256	≥128	≥128	≥256/4	64	0.25	≥16	≥16	1/4	2	0.25
CR-KP39	JBLJYA000000000	Yinzhou	blood	2023-05-20	15	19	67	Male	ICU	Diabetes Mellitus	yes	yes	yes	yes	no	no	yes	yes	yes	no	no	no	no	no	no	1	1	1	1	1	1	1	blaKPC-2;blaOXA-1;blaCTX-M-15;blaSHV-28;blaTEM-1	repB	aac(3)-IId、aac(6')-Ib-cr	gyrB、parC、parE	fyuA、ybtS、mrkA、mrkB、mrkC、mrkD	tet(A)	4	128	8	≥256/4	4	2	8	≥16	0.064/4	0.5	0.064
CR-KP40	JBLJYB000000000	Yinzhou	sputum	2023-05-23	11	64	84	Male	ICU	Hypertension	yes	yes	yes	yes	no	no	yes	no	yes	no	no	no	no	yes	no	3	3	1	1	1	1	4	blaKPC-2;blaSHV-11	IncFII、repB	/	gyrB、parC、parE、qnrS	rmpA2、fyuA、irp1、irp2、iucA、iucB、iucC、iucD、iutA、ybtS、mrkA、mrkB、mrkC、mrkD	tet(A)	256	≥128	≥128	≥256/4	64	0.25	≥16	≥16	0.5/4	0.5	0.5
CR-KP41	JBLJYC000000000	Yinzhou	feces	2023-06-06	15	19	71	Male	Gastrointestinal Surgery Ward	Diabetes Mellitus、Hypertension	yes	yes	yes	yes	no	no	no	no	yes	no	no	no	no	no	no	1	1	1	1	1	1	1	blaKPC-2;blaSHV-28	repB	aac(3)-IId	gyrB、parC、parE、qnrS	fyuA、irp2、ybtS、mrkA、mrkB、mrkC	tet(A)	128	128	32	256/4	64	2	16	≥16	0.25/4	0.5	0.25
CR-KP42	JBLJYD000000000	Yinzhou	sputum	2023-06-15	11	47	62	Male	ICU	Diabetes Mellitus、Hypertension	no	no	no	no	yes	no	no	no	yes	yes	no	no	no	no	no	3	3	1	1	1	1	4	blaKPC-2;blaCTX-M-65;blaSHV-11;blaTEM-1	IncFII	/	gyrB、parC、parE	fyuA、irp1、irp2、ybtS、mrkA、mrkB、mrkC、mrkD	/	64	≥128	128	≥256/4	32	1	16	≥16	0.5/4	0.5	0.125
CR-KP43	JBLJYE000000000	Yinzhou	blood	2023-07-29	11	64	72	Male	ICU	Malignant Tumor、Liver Dysfunction	no	no	no	no	no	no	yes	no	no	no	no	no	yes	no	no	3	3	1	1	1	1	4	blaKPC-2;blaSHV-12;blaTEM-1	IncFII、repB	/	gyrB、parC、parE	rmpA2、fyuA、irp1、irp2、iucA、iucB、iucC、iucD、iutA、ybtS、mrkA、mrkB、mrkC、mrkD	tet(A)	256	128	128	256/4	16	0.5	≥16	≥16	0.5/4	0.5	0.5
CR-KP44	JBLJYF000000000	Yinzhou	sputum	2023-08-10	685	16	40	Male	neurosurgery	Liver Dysfunction	no	no	no	no	yes	no	no	no	no	yes	no	no	yes	no	no	2	1	2	1	3	4	25	blaNDM-5;blaSHV-103;blaTEM-1	IncR、IncX3	/	gyrB、parC、parE	mrkA、mrkB、mrkC、mrkD、allR、allS	tet(A)	64	≥128	128	≥256/4	64	16	≥16	≥16	0.125/4	0.5	0.25
CR-KP45	JBLJYG000000000	Yinzhou	puncture fluid	2023-08-12	11	64	71	Male	ICU	Malignant Tumor、Hypertension	yes	yes	yes	yes	no	no	yes	no	yes	no	no	no	no	yes	no	3	3	1	1	1	1	4	blaKPC-2;blaSHV-12	IncFII、repB	/	gyrB、parC、parE	rmpA2、fyuA、irp1、irp2、iucA、iucB、iucC、iucD、iutA、ybtS、mrkA、mrkB、mrkC、mrkD	tet(A)	256	≥128	≥128	≥256/4	32	2	≥16	≥16	1/4	0.5	1
CR-KP46	JBLJYH000000000	Yinzhou	sputum	2023-08-17	11	64	52	Female	Hepatobiliary and pancreatic surgery	/	yes	no	no	no	yes	yes	yes	yes	yes	no	no	no	yes	yes	no	3	3	1	1	1	1	4	blaKPC-2;blaSHV-12;blaTEM-1	IncFII、repB	/	gyrB、parC、parE	rmpA2、fyuA、irp1、irp2、iucA、iucB、iucC、iucD、iutA、ybtS、mrkA、mrkB、mrkC、mrkD	tet(A)	256	≥128	≥128	≥256/4	32	1	≥16	≥16	0.5/4	0.5	1
CR-KP47	JBLJYI000000000	Yinzhou	sputum	2023-08-27	11	64	86	Female	Respiratory Critical Care Unit	Hypertension	no	no	no	no	no	no	yes	no	yes	no	no	yes	no	no	no	3	3	1	1	1	1	4	blaKPC-2;blaSHV-12;blaTEM-1	IncFII、repB	/	gyrB、parC、parE	rmpA2、fyuA、irp1、irp2、iucA、iucB、iucC、iucD、iutA、ybtS、mrkA、mrkB、mrkC、mrkD	tet(A)	256	≥128	≥128	≥256/4	32	1	≥16	≥16	0.5/4	0.5	0.5
CR-KP48	JBLJYG000000000	Yinzhou	sputum	2023-09-15	11	64	68	Male	ICU	Diabetes Mellitus、Hypertension	yes	yes	yes	yes	no	no	yes	no	yes	no	no	no	yes	no	no	3	3	1	1	1	1	4	blaKPC-2;blaSHV-12;blaTEM-1	IncFII、repB	/	gyrB、parC、parE	rmpA2、fyuA、irp1、irp2、iucA、iucB、iucC、iucD、iutA、mrkA、mrkB、mrkC、mrkD	tet(A)	256	≥128	≥128	≥256/4	64	1	≥16	≥16	0.5/4	0.5	0.5
CR-KP49	JBLJYK000000000	Yinzhou	sputum	2023-09-30	11	64	85	Female	Respiratory Critical Care Unit	Liver Dysfunction	no	no	no	no	no	no	no	no	yes	no	no	no	no	no	no	3	3	1	1	1	1	4	blaKPC-2;blaSHV-12;blaTEM-1	IncFII、repB	/	gyrB、parC、parE	rmpA2、fyuA、irp1、irp2、iucA、iucB、iucC、iucD、iutA、mrkA、mrkB、mrkC、mrkD	tet(A)	≥256	≥128	≥128	≥256/4	64	1	≥16	≥16	2/4	0.5	1
CR-KP50	JBLJYL000000000	Yinzhou	secretion	2023-10-07	11	64	38	Male	ICU	Liver Dysfunction	yes	yes	yes	yes	no	no	yes	no	yes	no	no	no	no	yes	no	3	3	1	1	1	1	4	blaKPC-2;blaSHV-12;blaTEM-1	IncFII、repB	/	gyrB、parC、parE	rmpA2、fyuA、irp1、irp2、iucA、iucB、iucC、iucD、iutA、mrkA、mrkB、mrkC、mrkD	tet(A)	256	≥128	≥128	≥256/4	32	2	≥16	≥16	0.5/4	0.25	1
CR-KP51	JBLJYM000000000	Yinzhou	sputum	2023-10-16	11	64	73	Male	Respiratory Critical Care Unit	Diabetes Mellitus	no	no	no	no	no	no	no	yes	no	no	no	no	no	no	no	3	3	1	1	1	1	4	blaKPC-2;blaSHV-12;blaTEM-1	IncFII、repB	/	gyrB、parC、parE	rmpA2、fyuA、irp1、irp2、iucA、iucB、iucC、iucD、iutA、ybtS、mrkA、mrkB、mrkC、mrkD	tet(A)	256	≥128	128	≥256/4	64	1	≥16	≥16	0.5/4	0.5	0.5
CR-KP52	JBLJYN000000000	Yinzhou	feces	2023-10-29	11	64	56	Male	Gastrointestinal Surgery Ward	Hypertension	no	no	no	no	no	no	no	yes	no	no	no	no	no	no	no	3	3	1	1	1	1	4	blaKPC-2;blaSHV-12;blaTEM-1	IncFII、repB	/	gyrB、parC、parE	rmpA2、fyuA、irp1、irp2、iucA、iucB、iucC、iucD、iutA、ybtS、mrkA、mrkB、mrkC、mrkD	tet(A)	256	≥128	≥128	≥256/4	32	1	≥16	≥16	1/4	0.5	0.5
CR-KP53	JBLJYO000000000	Yinzhou	sputum	2023-11-09	11	64	64	Male	Respiratory Critical Care Unit	Malignant Tumor、Liver Dysfunction	yes	yes	yes	yes	no	no	yes	no	yes	no	no	no	no	no	no	3	3	1	1	1	1	4	blaKPC-2;blaSHV-12;blaTEM-1	IncFII、repB	/	gyrB、parC、parE	rmpA2、fyuA、irp1、irp2、iucA、iucB、iucC、iucD、iutA、ybtS、mrkA、mrkB、mrkC、mrkD	tet(A)	128	≥128	≥128	≥256/4	64	2	≥16	≥16	1/4	0.5	0.5
CR-KP54	JBLJYP000000000	Yinzhou	sputum	2023-11-21	11	64	75	Male	neurosurgery	Liver Dysfunction、Hypertension	no	no	no	no	yes	no	no	no	yes	no	no	no	no	no	no	3	3	1	1	1	1	4	blaKPC-2;blaSHV-12;blaTEM-1	IncFII、repB	/	gyrB、parC、parE	rmpA2、fyuA、irp1、irp2、iucA、iucB、iucC、iucD、iutA、ybtS、mrkA、mrkB、mrkC、mrkD	tet(A)	128	≥128	≥128	≥256/4	32	1	≥16	≥16	1/4	0.5	0.5
CR-KP55	JBLJYQ000000000	Yinzhou	sputum	2023-12-05	11	64	65	Male	Respiratory Critical Care Unit	Malignant Tumor	yes	yes	yes	yes	no	no	yes	no	yes	no	no	no	no	no	no	3	3	1	1	1	1	4	blaKPC-2;blaSHV-12;blaTEM-1	IncFII、repB	/	gyrB、parC、parE	rmpA2、fyuA、irp1、irp2、iucA、iucB、iucC、iucD、iutA、ybtS、mrkA、mrkB、mrkC、mrkD	tet(A)	256	≥128	≥128	≥256/4	32	1	≥16	≥16	0.5/4	0.5	0.5
CR-KP56	JBLJYR000000000	Yinzhou	sputum	2023-12-14	11	64	34	Male	ICU	/	yes	yes	yes	yes	no	no	yes	no	yes	no	no	no	no	no	no	3	3	1	1	1	1	4	blaKPC-2;blaSHV-12;blaTEM-1	IncFII、repB	/	gyrB、parC、parE	rmpA2、fyuA、irp1、irp2、iucA、iucB、iucC、iucD、iutA、ybtS、mrkA、mrkB、mrkC、mrkD	tet(A)	256	≥128	≥128	≥256/4	32	1	≥16	≥16	1/4	1	0.5
CR-KP57	JBLJYS000000000	Yinzhou	urine	2023-12-27	11	64	64	Female	ICU	Diabetes Mellitus、Liver Dysfunction	no	no	no	no	no	no	yes	no	no	no	no	no	no	yes	no	3	3	1	1	1	1	4	blaKPC-2;blaSHV-12;blaTEM-1	IncFII、repB	/	gyrB、parC、parE	rmpA2、fyuA、irp1、irp2、iucA、iucB、iucC、iucD、iutA、ybtS、mrkA、mrkB、mrkC、mrkD	tet(A)	256	128	128	≥256/4	16	1	≥16	≥16	0.5/4	0.5	1
CR-KP58	JBLJYT000000000	Yinzhou	sputum	2024-01-08	15	112	64	Female	Respiratory Critical Care Unit	Hypertension、Liver Dysfunction	no	no	no	no	yes	no	yes	no	no	yes	no	no	no	yes	no	1	1	1	1	1	1	1	blaOXA-232;blaCTX-M-15;blaSHV-28	ColKP3、IncHI1B、repB	/	gyrB、parC、parE	fyuA、irp1、irp2、iucA、iucB、iucC、iucD、iutA、ybtS、mrkA、mrkB、mrkC、mrkD	/	16	≥128	≥128	≥256/4	32	8	16	≥16	0.125/4	0.5	0.064
CR-KP59	JBLJYU000000000	Yinzhou	sputum	2024-01-14	11	64	71	Male	Respiratory Critical Care Unit	Diabetes Mellitus、Malignant Tumor	yes	yes	yes	yes	no	no	yes	no	yes	no	yes	no	no	yes	no	3	3	1	1	1	1	4	blaKPC-2;blaSHV-12;blaTEM-1	IncFII、repB	/	gyrB、parC、parE	rmpA2、fyuA、irp1、irp2、iucA、iucB、iucC、iucD、iutA、ybtS、mrkA、mrkB、mrkC、mrkD	tet(A)	256	≥128	128	≥256/4	32	1	≥16	≥16	1/4	0.5	1
CR-KP60	JBLJYV000000000	Yinzhou	urine	2024-01-24	11	64	53	Female	neurosurgery	Hypertension	yes	yes	yes	yes	no	no	no	no	yes	no	no	no	no	no	no	3	3	1	1	1	1	4	blaKPC-2;blaSHV-12;blaTEM-1	IncFII、repB	/	gyrB、parC、parE	rmpA2、fyuA、irp1、irp2、iucA、iucB、iucC、iucD、iutA、ybtS、mrkA、mrkB、mrkC、mrkD	tet(A)	256	≥128	≥128	≥256/4	64	1	≥16	≥16	2/4	0.5	0.5
CR-KP61	JBLJYW000000000	Yinzhou	sputum	2024-01-30	11	64	76	Male	Respiratory Critical Care Unit	/	no	no	no	no	no	no	yes	no	yes	yes	no	no	no	no	no	3	3	1	1	1	1	4	blaKPC-2;blaSHV-12;blaTEM-1	IncFII、repB	/	gyrB、parC、parE	rmpA2、fyuA、irp1、irp2、iucA、iucB、iucC、iucD、iutA、ybtS、mrkA、mrkB、mrkC、mrkD	tet(A)	256	≥128	≥128	≥256/4	64	0.5	≥16	≥16	0.5/4	1	0.5
CR-KP62	JBLJYX000000000	Yinzhou	sputum	2024-02-04	11	64	33	Male	Respiratory Critical Care Unit	/	no	no	no	no	no	no	no	no	yes	no	no	no	no	no	no	3	3	1	1	1	1	4	blaKPC-2;blaSHV-12;blaTEM-1	IncFII、repB	/	gyrB、parC、parE	rmpA2、fyuA、irp1、irp2、iucA、iucB、iucC、iucD、iutA、ybtS、mrkA、mrkB、mrkC、mrkD	tet(A)	256	≥128	≥128	≥256/4	32	2	≥16	≥16	1/4	0.5	1
CR-KP63	JBLJYY000000000	Yinzhou	bile	2024-02-07	11	64	56	Male	ICU	Diabetes Mellitus、Hypertension	yes	yes	yes	yes	no	no	yes	no	yes	no	no	no	yes	no	no	3	3	1	1	1	1	4	blaKPC-2;blaSHV-12;blaTEM-1	IncFII、repB	/	gyrB、parC、parE	rmpA2、fyuA、irp1、irp2、iucA、iucB、iucC、iucD、iutA、ybtS、mrkA、mrkB、mrkC、mrkD	tet(A)	256	≥128	≥128	≥256/4	32	2	≥16	≥16	0.5/4	0.5	1
CR-KP64	JBLJYZ000000000	Yinzhou	bronchoalveolar lavage fluid（BALF)	2024-02-11	15	19	64	Male	ICU	Malignant Tumor	yes	yes	yes	yes	no	no	yes	no	yes	no	no	no	no	no	no	1	1	1	1	1	1	1	blaKPC-2;blaOXA-1;blaCTX-M-15;blaSHV-28;blaTEM-1	repB	aac(3)-IId、aac(6')-Ib-cr	gyrB、parC、parE	fyuA、irp2、ybtS、mrkA、mrkB、mrkC、mrkD	tet(A)	≥256	≥128	≥128	≥256/4	128	2	8	≥16	1/4	0.5	0.125
CR-KP65	JBLGZA000000000	Yinzhou	sputum	2024-02-15	11	64	80	Male	Hepatology and Infectious Diseases Ward	Malignant Tumor	no	no	no	no	no	no	no	no	yes	no	no	no	no	no	no	3	3	1	1	1	1	4	blaKPC-2;blaSHV-12;blaTEM-1	IncFII、repB	/	gyrB、parC、parE	rmpA2、fyuA、irp1、irp2、iucA、iucB、iucC、iucD、iutA、ybtS、mrkA、mrkB、mrkC、mrkD	tet(A)	256	≥128	≥128	≥256/4	32	1	≥16	≥16	0.5/4	0.5	0.5
CR-KP66	JBLGZB000000000	Yinzhou	urine	2024-02-18	15	19	70	Male	Nephrology Ward	Personal History of Cerebral Infarction	no	no	no	no	no	no	no	no	yes	no	no	no	no	yes	no	1	1	1	1	1	1	1	blaKPC-2;blaOXA-1;blaCTX-M-15;blaSHV-28;blaTEM-1	repB	aac(3)-IId、aac(6')-Ib-cr	gyrB、parC、parE	fyuA、irp2、ybtS、mrkA、mrkB、mrkC、mrkD	tet(A)	≥256	≥128	≥128	≥256/4	64	2	16	≥16	0.5/4	1	0.125
CR-KP67	JBLGZC000000000	Yinzhou	sputum	2024-02-27	11	64	37	Male	ICU	Diabetes Mellitus	no	no	no	no	no	no	no	no	no	yes	no	no	no	no	no	3	3	1	1	1	1	4	blaKPC-2;blaCTX-M-55;blaSHV-11;blaTEM-1	IncFII、repB、IncI1-I	/	gyrB、parC、parE	rmpA2、fyuA、irp2、iucA、iutA、iucB、iucC、iucD、ybtS、mrkA、mrkB、mrkC、mrkD	/	256	≥128	≥128	≥256/4	64	1	≥16	≥16	0.25/4	0.5	1
CR-KP68	JBLGZD000000000	Yinzhou	sputum	2024-03-11	16	15	60	Female	ICU	Diabetes Mellitus、Hypertension	no	no	no	no	yes	no	no	no	yes	yes	no	no	no	no	no	2	1	2	1	4	4	4	blaNDM-4;blaCTX-M-15;blaSHV-1;blaTEM-1	Col440II、IncQ1	aph(3')-Ia、aac(3)-IId、aac(6')-Ib-cr、aph(6)-Id	gyrB	fyuA、irp1、irp2、ybtS、mrkA、mrkB、mrkC、mrkD	tet(A)	64	≥128	64	≥256/4	16	256	≥16	≥16	0.125/4	0.5	0.25
CR-KP69	JBLGZE000000000	Yinzhou	sputum	2024-03-20	15	110	72	Female	ICU	Malignant Tumor、Liver Dysfunction	no	no	no	no	no	no	yes	no	no	no	no	no	yes	no	no	1	1	1	1	1	1	1	blaNDM-5;blaCTX-M-55;blaTEM-1	IncFII、IncX4	aac(6')-Ib-cr、aph(6)-Id	gyrB、parC、parE	mrkB、mrkC	tet(A)	256	32	≥128	≥256/4	256	2	≥16	≥16	0.5/4	0.5	0.125
CR-KP70	JBLGZF000000000	Yinzhou	bile	2024-03-28	15	110	40	Female	neurosurgery	Liver Dysfunction	no	no	no	no	yes	no	no	no	no	yes	no	no	yes	no	no	1	1	1	1	1	1	1	blaNDM-5;blaCTX-M-55;blaSHV-55;blaSHV-12;blaTEM-1	IncFII、IncHI2	aac(6')-Ib-cr、aph(6)-Id	gyrB、parC、parE	mrkB、mrkC	tet(A)	64	≥128	32	≥256/4	8	1	≥16	≥16	0.25/4	0.5	0.125
CR-KP71	JBLGZG000000000	Yinzhou	sputum	2024-04-16	16	15	76	Male	ICU	Malignant Tumor	yes	no	no	no	no	no	yes	no	no	no	no	no	no	yes	no	2	1	2	1	4	4	4	blaNDM-4;blaCTX-M-15;blaSHV-1;blaTEM-1	Col440II、IncQ1	aph(3')-Ia、aac(6')-Ib-cr、aph(6)-Id	gyrB	fyuA、irp1、irp2、ybtS、mrkA、mrkB、mrkC、mrkD	tet(A)	32	≥128	64	≥256/4	8	256	≥16	≥16	0.125/4	0.5	0.25
CR-KP72	JBLGZH000000000	Yinzhou	sputum	2024-04-21	11	64	78	Male	ICU	Hypertension、Liver Dysfunction	yes	yes	yes	yes	no	no	no	no	yes	no	no	no	no	no	no	3	3	1	1	1	1	4	blaKPC-2;blaCTX-M-65;blaSHV-11;blaTEM-1	IncFII	/	gyrB、parC、parE	fyuA、irp1、irp2、ybtS、mrkA、mrkB、mrkC、mrkD	/	≥256	≥128	≥128	≥256/4	128	2	≥16	≥16	1/4	1	0.125
CR-KP73	JBLGZI000000000	Yinzhou	blood	2024-04-29	15	28	64	Female	ICU	Hypertension	no	no	no	no	yes	yes	yes	yes	yes	no	yes	no	yes	no	no	1	1	1	1	1	1	1	blaNDM-5;blaCTX-M-3;blaSHV-28;blaTEM-1	IncX3	/	gyrB、parC、parE、qnrS	fyuA、irp1、irp2、ybtS、mrkA、mrkB、mrkC、mrkD	/	≥256	≥128	≥128	≥256/4	256	0.125	16	16	0.125/4	0.5	0.064
CR-KP74	JBLGZJ000000000	Yinzhou	sputum	2024-05-11	438	74	82	Male	Respiratory Critical Care Unit	/	no	no	no	no	no	no	no	yes	no	no	no	no	no	no	no	3	4	6	1	1	4	4	blaNDM-1;blaCTX-M-3;blaDHA-1;blaSHV-12;blaTEM-1	IncHI1B、IncQ1、IncX3	aph(3')-Ia、aac(3)-IId、aac(6')-Ib-cr、armA、aph(6)-Id	gyrB、parC、parE、qnrS	mrkA、mrkB、mrkC、mrkD	tet(A)、tmexD1、TOprJ1	256	≥128	128	≥256/4	16	≥256	≥16	≥16	0.25/4	0.5	2
CR-KP75	JBLGZK000000000	Yinzhou	bile	2024-05-15	11	64	64	Male	ICU	Diabetes Mellitus、Hypertension	yes	yes	yes	yes	yes	no	yes	yes	yes	no	no	no	yes	no	no	3	3	1	1	1	1	4	blaKPC-2;blaNDM-1;blaCTX-M-3;blaCTX-M-65;blaSHV-12;blaTEM-1	IncFII、IncQ1、IncX3、repB	aac(3)-IId、aac(6')-Ib-cr	gyrB、parC、parE、qnrS	rmpA2、fyuA、irp1、irp2、iucA、iucB、iucC、iucD、iutA、ybtS、mrkA、mrkB、mrkC、mrkD	/	≥256	≥128	≥128	≥256/4	256	2	≥16	≥16	1/4	0.5	0.125
CR-KP76	JBLGZL000000000	Yinzhou	bile	2024-05-18	11	64	52	Female	ICU	Diabetes Mellitus	yes	no	no	no	yes	yes	no	yes	yes	no	no	no	yes	yes	no	3	3	1	1	1	1	4	blaKPC-2;blaNDM-1;blaCTX-M-3;blaCTX-M-65;blaSHV-12;blaTEM-1	IncFII、IncQ1、IncX3、repB	aac(3)-IId、aac(6')-Ib-cr	gyrB、parC、parE、qnrS	rmpA2、fyuA、irp1、irp2、iucA、iucB、iucC、iucD、iutA、ybtS、mrkA、mrkB、mrkC、mrkD	/	≥256	≥128	≥128	≥256/4	64	1	16	≥16	1/4	2	0.125
CR-KP77	JBLGZM000000000	Yinzhou	blood	2024-05-21	11	64	76	Female	ICU	Diabetes Mellitus、Malignant Tumor、Personal History of Cerebral Infarction	yes	yes	yes	yes	no	no	yes	no	yes	no	no	no	no	no	no	3	3	1	1	1	1	4	blaKPC-2;blaNDM-1;blaCTX-M-3;blaCTX-M-65;blaSHV-12;blaTEM-1	IncFII、IncQ1、IncX3、repB	aac(3)-IId、aac(6')-Ib-cr	gyrB、parC、parE、qnrS	rmpA2、fyuA、irp1、irp2、iucA、iucB、iucC、iucD、iutA、ybtS、mrkA、mrkB、mrkC、mrkD	/	≥256	≥128	≥128	≥256/4	64	1	≥16	≥16	2/4	1	0.125
CR-KP78	JBLGZN000000000	Yinzhou	bronchoalveolar lavage fluid（BALF)	2024-06-05	11	64	84	Male	ICU	/	yes	yes	yes	yes	no	no	yes	no	yes	no	no	no	no	yes	no	3	3	1	1	1	1	4	blaKPC-2;blaNDM-1;blaCTX-M-65;blaSHV-12	IncFII、IncQ1、IncX3、repB	aac(3)-IId、aac(6')-Ib-cr	gyrB、parC、parE、qnrS	rmpA2、fyuA、irp1、irp2、iucA、iucB、iucC、iucD、iutA、ybtS、mrkA、mrkB、mrkC、mrkD	/	≥256	≥128	≥128	≥256/4	128	1	16	≥16	2/4	0.5	0.125
CR-KP79	JBLGZO000000000	Yinzhou	secretion	2024-06-11	43	61	56	Male	ICU	Diabetes Mellitus	yes	yes	yes	yes	no	no	yes	yes	yes	no	no	no	no	no	no	2	6	1	5	11	1	15	blaNDM-5;blaCTX-M-3;blaSHV-11;blaTEM-1	IncQ1、IncX3	aph(6)-Id	gyrB、parC、parE、qnrS	iucA、iucB、iucC、iucD、iutA	tet(A)	256	≥128	≥128	≥256/4	32	0.125	8	4	0.125/4	0.5	1
CR-KP80	JBLGZP000000000	Yinzhou	urine	2024-06-18	664	unknow	78	Female	ICU	Diabetes Mellitus、Malignant Tumor、Personal History of Cerebral Infarction	yes	yes	yes	yes	no	no	yes	no	yes	no	no	no	no	no	no	52	1	20	2	1	1	47	blaNDM-5;blaCTX-M-3;blaSHV-11;blaTEM-1	IncX3	aph(6)-Id	gyrB、parC、parE	fyuA、irp2、ybtS、mrkA、mrkC、mrkD	/	128	≥128	32	≥256/4	32	2	0.5	0.5	0.064/4	0.5	0.125
CR-KP81	JBLGZQ000000000	Yinzhou	bile	2024-06-25	15	28	57	Female	Hepatobiliary and pancreatic surgery	Diabetes Mellitus	no	no	no	no	no	no	no	no	yes	no	no	no	no	no	no	1	1	1	1	1	1	1	blaNDM-1;blaOXA-1;blaCTX-M-14;blaCTX-M-15;blaTEM-1	IncHI2、IncX3	aac(3)-IId、aac(6')-Ib-cr、aph(6)-Id	gyrB、parC、parE、qnrS	mrkA、mrkB、mrkC、mrkD	tet(A)	256	≥128	64	≥256/4	16	1	≥16	≥16	0.125/4	0.5	1
[truncated: 1 more columns]
